# Supplementary material
Source: publisher site journal article supplement (https://www.dovepress.com/get_supplementary_file.php?f=500115.xlsx)
Supplement: Supplementary file 1 [file get_supplementary_file.php]

## Sheet: Supplementary Table S1
Supplementary Table S1: Clinical samples of dataset GSE72326. Note:157 SLE samples and 20 healthy controls were included
Acc	Platform	Organism	Source	group	age	gender	race	country of origin
GSM1860068	GPL10558	Homo sapiens	Whole Blood	Healthy control of SLE	age: 38	gender: M	Caucasian	France
GSM1860069	GPL10558	Homo sapiens	Whole Blood	Healthy control of SLE	age: 25	gender: F	Caucasian	France
GSM1860070	GPL10558	Homo sapiens	Whole Blood	Healthy control of SLE	age: 51	gender: M	Caucasian	France
GSM1860071	GPL10558	Homo sapiens	Whole Blood	Healthy control of SLE	age: 18	gender: F	Caucasian	France
GSM1860072	GPL10558	Homo sapiens	Whole Blood	Healthy control of SLE	age: 38	gender: F	Caucasian	France
GSM1860073	GPL10558	Homo sapiens	Whole Blood	Healthy control of SLE	age: 65	gender: F	Caucasian	North Africa
GSM1860074	GPL10558	Homo sapiens	Whole Blood	Healthy control of SLE	age: 35	gender: F	Caucasian	North Africa
GSM1860075	GPL10558	Homo sapiens	Whole Blood	Healthy control of SLE	age: 43	gender: F	Caucasian	North Africa
GSM1860076	GPL10558	Homo sapiens	Whole Blood	Healthy control of SLE	age: 40	gender: F	Caucasian	North Africa
GSM1860077	GPL10558	Homo sapiens	Whole Blood	Healthy control of SLE	age: 45	gender: F	Black	French West Indies
GSM1860078	GPL10558	Homo sapiens	Whole Blood	Healthy control of SLE	age: 37	gender: M	Caucasian	North Africa
GSM1860079	GPL10558	Homo sapiens	Whole Blood	Healthy control of SLE	age: 21	gender: F	Caucasian	France
GSM1860080	GPL10558	Homo sapiens	Whole Blood	Healthy control of SLE	age: 57	gender: F	Caucasian	France
GSM1860081	GPL10558	Homo sapiens	Whole Blood	Healthy control of SLE	age: 19	gender: F	Caucasian	France
GSM1860082	GPL10558	Homo sapiens	Whole Blood	Healthy control of SLE	age: 37	gender: F	Caucasian	France
GSM1860083	GPL10558	Homo sapiens	Whole Blood	Healthy control of SLE	age: 50	gender: F	Caucasian	France
GSM1860084	GPL10558	Homo sapiens	Whole Blood	Healthy control of SLE	age: 52	gender: F	Caucasian	France
GSM1860085	GPL10558	Homo sapiens	Whole Blood	Healthy control of SLE	age: 29	gender: F	Caucasian	North Africa
GSM1860086	GPL10558	Homo sapiens	Whole Blood	Healthy control of SLE	age: 42	gender: F	Caucasian	North Africa
GSM1860087	GPL10558	Homo sapiens	Whole Blood	Healthy control of SLE	age: 67	gender: F	Caucasian	France
GSM1860088	GPL10558	Homo sapiens	Whole Blood	SLE	age: 52	gender: F	Caucasian	France
GSM1860089	GPL10558	Homo sapiens	Whole Blood	SLE	age: 58	gender: F	Caucasian	France
GSM1860090	GPL10558	Homo sapiens	Whole Blood	SLE	age: 56	gender: M	Caucasian	France
GSM1860091	GPL10558	Homo sapiens	Whole Blood	SLE	age: 42	gender: F	Caucasian	France
GSM1860092	GPL10558	Homo sapiens	Whole Blood	SLE	age: 50	gender: M	Caucasian	France
GSM1860093	GPL10558	Homo sapiens	Whole Blood	SLE	age: 44	gender: F	Caucasian	France
GSM1860094	GPL10558	Homo sapiens	Whole Blood	SLE	age: 25	gender: M	Caucasian	France
GSM1860095	GPL10558	Homo sapiens	Whole Blood	SLE	age: 54	gender: F	Caucasian	France
GSM1860096	GPL10558	Homo sapiens	Whole Blood	SLE	age: 45	gender: F	Caucasian	France
GSM1860097	GPL10558	Homo sapiens	Whole Blood	SLE	age: 39	gender: F	Caucasian	North Africa
GSM1860098	GPL10558	Homo sapiens	Whole Blood	SLE	age: 42	gender: F	Caucasian	France
GSM1860099	GPL10558	Homo sapiens	Whole Blood	SLE	age: 41	gender: F	Caucasian	France
GSM1860100	GPL10558	Homo sapiens	Whole Blood	SLE	age: 28	gender: F	Caucasian	North Africa
GSM1860101	GPL10558	Homo sapiens	Whole Blood	SLE	age: 32	gender: F	Caucasian	North Africa
GSM1860102	GPL10558	Homo sapiens	Whole Blood	SLE	age: 47	gender: F	Caucasian	North Africa
GSM1860103	GPL10558	Homo sapiens	Whole Blood	SLE	age: 23	gender: F	Caucasian	France
GSM1860104	GPL10558	Homo sapiens	Whole Blood	SLE	age: 31	gender: M	Caucasian	North Africa
GSM1860105	GPL10558	Homo sapiens	Whole Blood	SLE	age: 35	gender: F	Caucasian	North Africa
GSM1860106	GPL10558	Homo sapiens	Whole Blood	SLE	age: 56	gender: F	Caucasian	North Africa
GSM1860107	GPL10558	Homo sapiens	Whole Blood	SLE	age: 20	gender: F	Caucasian	France
GSM1860108	GPL10558	Homo sapiens	Whole Blood	SLE	age: 71	gender: F	Caucasian	France
GSM1860109	GPL10558	Homo sapiens	Whole Blood	SLE	age: 56	gender: M	Caucasian	France
GSM1860110	GPL10558	Homo sapiens	Whole Blood	SLE	age: 27	gender: M	Caucasian	Vietnam
GSM1860111	GPL10558	Homo sapiens	Whole Blood	SLE	age: 47	gender: F	Caucasian	France
GSM1860112	GPL10558	Homo sapiens	Whole Blood	SLE	age: 43	gender: F	Caucasian	France
GSM1860113	GPL10558	Homo sapiens	Whole Blood	SLE	age: 56	gender: M	Caucasian	France
GSM1860114	GPL10558	Homo sapiens	Whole Blood	SLE	age: 36	gender: F	Caucasian	Cuba
GSM1860115	GPL10558	Homo sapiens	Whole Blood	SLE	age: 54	gender: F	Caucasian	North Africa
GSM1860116	GPL10558	Homo sapiens	Whole Blood	SLE	age: 32	gender: F	Caucasian	North Africa
GSM1860117	GPL10558	Homo sapiens	Whole Blood	SLE	age: 40	gender: F	Caucasian	France
GSM1860118	GPL10558	Homo sapiens	Whole Blood	SLE	age: 47	gender: F	Caucasian	France
GSM1860119	GPL10558	Homo sapiens	Whole Blood	SLE	age: 27	gender: F	Caucasian	France
GSM1860120	GPL10558	Homo sapiens	Whole Blood	SLE	age: 38	gender: F	Black	New Caledonia
GSM1860121	GPL10558	Homo sapiens	Whole Blood	SLE	age: 56	gender: M	Caucasian	France
GSM1860122	GPL10558	Homo sapiens	Whole Blood	SLE	age: 48	gender: F	Caucasian	North Africa
GSM1860123	GPL10558	Homo sapiens	Whole Blood	SLE	age: 41	gender: M	Caucasian	North Africa
GSM1860124	GPL10558	Homo sapiens	Whole Blood	SLE	age: 54	gender: F	Caucasian	North Africa
GSM1860125	GPL10558	Homo sapiens	Whole Blood	SLE	age: 42	gender: F	Caucasian	France
GSM1860126	GPL10558	Homo sapiens	Whole Blood	SLE	age: 20	gender: F	Caucasian	France
GSM1860127	GPL10558	Homo sapiens	Whole Blood	SLE	age: 54	gender: F	Caucasian	France
GSM1860128	GPL10558	Homo sapiens	Whole Blood	SLE	age: 56	gender: M	Caucasian	France
GSM1860129	GPL10558	Homo sapiens	Whole Blood	SLE	age: 43	gender: F	Caucasian	France
GSM1860130	GPL10558	Homo sapiens	Whole Blood	SLE	age: 23	gender: F	Caucasian	France
GSM1860131	GPL10558	Homo sapiens	Whole Blood	SLE	age: 50	gender: M	Caucasian	France
GSM1860132	GPL10558	Homo sapiens	Whole Blood	SLE	age: 39	gender: F	Caucasian	North Africa
GSM1860133	GPL10558	Homo sapiens	Whole Blood	SLE	age: 47	gender: F	Caucasian	North Africa
GSM1860134	GPL10558	Homo sapiens	Whole Blood	SLE	age: 42	gender: F	Caucasian	France
GSM1860135	GPL10558	Homo sapiens	Whole Blood	SLE	age: 38	gender: F	Caucasian	France
GSM1860136	GPL10558	Homo sapiens	Whole Blood	SLE	age: 52	gender: F	Caucasian	France
GSM1860137	GPL10558	Homo sapiens	Whole Blood	SLE	age: 46	gender: F	Caucasian	North Africa
GSM1860138	GPL10558	Homo sapiens	Whole Blood	SLE	age: 70	gender: F	Caucasian	France
GSM1860139	GPL10558	Homo sapiens	Whole Blood	SLE	age: 30	gender: M	Caucasian	France
GSM1860140	GPL10558	Homo sapiens	Whole Blood	SLE	age: 51	gender: F	Caucasian	France
GSM1860141	GPL10558	Homo sapiens	Whole Blood	SLE	age: 49	gender: F	Caucasian	North Africa
GSM1860142	GPL10558	Homo sapiens	Whole Blood	SLE	age: 47	gender: F	Caucasian	North Africa
GSM1860143	GPL10558	Homo sapiens	Whole Blood	SLE	age: 40	gender: M	Caucasian	North Africa
GSM1860144	GPL10558	Homo sapiens	Whole Blood	SLE	age: 30	gender: F	Caucasian	France
GSM1860145	GPL10558	Homo sapiens	Whole Blood	SLE	age: 26	gender: F	Caucasian	France
GSM1860146	GPL10558	Homo sapiens	Whole Blood	SLE	age: 41	gender: M	Caucasian	North Africa
GSM1860147	GPL10558	Homo sapiens	Whole Blood	SLE	age: 45	gender: F	Caucasian	North Africa
GSM1860148	GPL10558	Homo sapiens	Whole Blood	SLE	age: 25	gender: F	Caucasian	North Africa
GSM1860149	GPL10558	Homo sapiens	Whole Blood	SLE	age: 26	gender: F	Caucasian	France
GSM1860150	GPL10558	Homo sapiens	Whole Blood	SLE	age: 51	gender: F	Caucasian	North Africa
GSM1860151	GPL10558	Homo sapiens	Whole Blood	SLE	age: 35	gender: F	Caucasian	France
GSM1860152	GPL10558	Homo sapiens	Whole Blood	SLE	age: 54	gender: F	Caucasian	France
GSM1860153	GPL10558	Homo sapiens	Whole Blood	SLE	age: 32	gender: F	Black	Zaire
GSM1860154	GPL10558	Homo sapiens	Whole Blood	SLE	age: 49	gender: M	Caucasian	France
GSM1860155	GPL10558	Homo sapiens	Whole Blood	SLE	age: 41	gender: F	Caucasian	France
GSM1860156	GPL10558	Homo sapiens	Whole Blood	SLE	age: 71	gender: F	Caucasian	France
GSM1860157	GPL10558	Homo sapiens	Whole Blood	SLE	age: 27	gender: F	Caucasian	France
GSM1860158	GPL10558	Homo sapiens	Whole Blood	SLE	age: 60	gender: F	Caucasian	France
GSM1860159	GPL10558	Homo sapiens	Whole Blood	SLE	age: 42	gender: F	Caucasian	France
GSM1860160	GPL10558	Homo sapiens	Whole Blood	SLE	age: 42	gender: F	Caucasian	France
GSM1860161	GPL10558	Homo sapiens	Whole Blood	SLE	age: 45	gender: F	Caucasian	North Africa
GSM1860162	GPL10558	Homo sapiens	Whole Blood	SLE	age: 54	gender: F	Caucasian	North Africa
GSM1860163	GPL10558	Homo sapiens	Whole Blood	SLE	age: 35	gender: F	Caucasian	North Africa
GSM1860164	GPL10558	Homo sapiens	Whole Blood	SLE	age: 27	gender: F	Caucasian	France
GSM1860165	GPL10558	Homo sapiens	Whole Blood	SLE	age: 34	gender: F	Caucasian	North Africa
GSM1860166	GPL10558	Homo sapiens	Whole Blood	SLE	age: 37	gender: F	Caucasian	France
GSM1860167	GPL10558	Homo sapiens	Whole Blood	SLE	age: 31	gender: M	Caucasian	North Africa
GSM1860168	GPL10558	Homo sapiens	Whole Blood	SLE	age: 43	gender: M	Caucasian	France
GSM1860169	GPL10558	Homo sapiens	Whole Blood	SLE	age: 27	gender: F	Caucasian	France
GSM1860170	GPL10558	Homo sapiens	Whole Blood	SLE	age: 50	gender: M	Caucasian	France
GSM1860171	GPL10558	Homo sapiens	Whole Blood	SLE	age: 36	gender: F	Caucasian	France
GSM1860172	GPL10558	Homo sapiens	Whole Blood	SLE	age: 36	gender: F	Black	Cuba
GSM1860173	GPL10558	Homo sapiens	Whole Blood	SLE	age: 31	gender: F	Caucasian	France
GSM1860174	GPL10558	Homo sapiens	Whole Blood	SLE	age: 55	gender: F	Caucasian	France
GSM1860175	GPL10558	Homo sapiens	Whole Blood	SLE	age: 27	gender: F	Caucasian	North Africa
GSM1860176	GPL10558	Homo sapiens	Whole Blood	SLE	age: 50	gender: M	Caucasian	France
GSM1860177	GPL10558	Homo sapiens	Whole Blood	SLE	age: 58	gender: F	Caucasian	France
GSM1860178	GPL10558	Homo sapiens	Whole Blood	SLE	age: 42	gender: F	Caucasian	France
GSM1860179	GPL10558	Homo sapiens	Whole Blood	SLE	age: 38	gender: F	Caucasian	France
GSM1860180	GPL10558	Homo sapiens	Whole Blood	SLE	age: 27	gender: F	Asian	Philippines
GSM1860181	GPL10558	Homo sapiens	Whole Blood	SLE	age: 32	gender: F	Caucasian	France
GSM1860182	GPL10558	Homo sapiens	Whole Blood	SLE	age: 39	gender: F	Caucasian	North Africa
GSM1860183	GPL10558	Homo sapiens	Whole Blood	SLE	age: 55	gender: F	Caucasian	North Africa
GSM1860184	GPL10558	Homo sapiens	Whole Blood	SLE	age: 38	gender: F	Caucasian	France
GSM1860185	GPL10558	Homo sapiens	Whole Blood	SLE	age: 36	gender: F	Black	Cuba
GSM1860186	GPL10558	Homo sapiens	Whole Blood	SLE	age: 51	gender: F	Black	Comorres
GSM1860187	GPL10558	Homo sapiens	Whole Blood	SLE	age: 54	gender: F	Caucasian	North Africa
GSM1860188	GPL10558	Homo sapiens	Whole Blood	SLE	age: 23	gender: F	Caucasian	France
GSM1860189	GPL10558	Homo sapiens	Whole Blood	SLE	age: 51	gender: F	Caucasian	France
GSM1860190	GPL10558	Homo sapiens	Whole Blood	SLE	age: 20	gender: F	Caucasian	France
GSM1860191	GPL10558	Homo sapiens	Whole Blood	SLE	age: 49	gender: F	Caucasian	North Africa
GSM1860192	GPL10558	Homo sapiens	Whole Blood	SLE	age: 34	gender: F	Caucasian	France
GSM1860193	GPL10558	Homo sapiens	Whole Blood	SLE	age: 54	gender: F	Caucasian	North Africa
GSM1860194	GPL10558	Homo sapiens	Whole Blood	SLE	age: 25	gender: F	Caucasian	France
GSM1860195	GPL10558	Homo sapiens	Whole Blood	SLE	age: 25	gender: F	Caucasian	North Africa
GSM1860196	GPL10558	Homo sapiens	Whole Blood	SLE	age: 21	gender: F	Caucasian	France
GSM1860197	GPL10558	Homo sapiens	Whole Blood	SLE	age: 36	gender: F	Caucasian	North Africa
GSM1860198	GPL10558	Homo sapiens	Whole Blood	SLE	age: 67	gender: F	Caucasian	France
GSM1860199	GPL10558	Homo sapiens	Whole Blood	SLE	age: 36	gender: F	Caucasian	North Africa
GSM1860200	GPL10558	Homo sapiens	Whole Blood	SLE	age: 44	gender: M	Caucasian	France
GSM1860201	GPL10558	Homo sapiens	Whole Blood	SLE	age: 52	gender: F	Caucasian	France
GSM1860202	GPL10558	Homo sapiens	Whole Blood	SLE	age: 55	gender: F	Caucasian	North Africa
GSM1860203	GPL10558	Homo sapiens	Whole Blood	SLE	age: 36	gender: F	Black	Cuba
GSM1860204	GPL10558	Homo sapiens	Whole Blood	SLE	age: 26	gender: F	Caucasian	North Africa
GSM1860205	GPL10558	Homo sapiens	Whole Blood	SLE	age: 33	gender: F	Caucasian	France
GSM1860206	GPL10558	Homo sapiens	Whole Blood	SLE	age: 26	gender: F	Asian	Philippines
GSM1860207	GPL10558	Homo sapiens	Whole Blood	SLE	age: 36	gender: F	Caucasian	North Africa
GSM1860208	GPL10558	Homo sapiens	Whole Blood	SLE	age: 35	gender: F	Caucasian	France
GSM1860209	GPL10558	Homo sapiens	Whole Blood	SLE	age: 37	gender: F	Caucasian	North Africa
GSM1860210	GPL10558	Homo sapiens	Whole Blood	SLE	age: 46	gender: F	Caucasian	France
GSM1860211	GPL10558	Homo sapiens	Whole Blood	SLE	age: 31	gender: F	Caucasian	France
GSM1860212	GPL10558	Homo sapiens	Whole Blood	SLE	age: 52	gender: F	Caucasian	North Africa
GSM1860213	GPL10558	Homo sapiens	Whole Blood	SLE	age: 59	gender: F	Caucasian	France
GSM1860214	GPL10558	Homo sapiens	Whole Blood	SLE	age: 36	gender: F	Caucasian	North Africa
GSM1860215	GPL10558	Homo sapiens	Whole Blood	SLE	age: 27	gender: M	Asian	Vietnam
GSM1860216	GPL10558	Homo sapiens	Whole Blood	SLE	age: 38	gender: F	Caucasian	France
GSM1860217	GPL10558	Homo sapiens	Whole Blood	SLE	age: 37	gender: F	Caucasian	France
GSM1860218	GPL10558	Homo sapiens	Whole Blood	SLE	age: 48	gender: F	Caucasian	North Africa
GSM1860219	GPL10558	Homo sapiens	Whole Blood	SLE	age: 26	gender: M	Caucasian	France
GSM1860220	GPL10558	Homo sapiens	Whole Blood	SLE	age: 22	gender: F	Caucasian	France
GSM1860221	GPL10558	Homo sapiens	Whole Blood	SLE	age: 27	gender: M	Caucasian	France
GSM1860222	GPL10558	Homo sapiens	Whole Blood	SLE	age: 52	gender: F	Caucasian	France
GSM1860223	GPL10558	Homo sapiens	Whole Blood	SLE	age: 52	gender: F	Black	Comorres
GSM1860224	GPL10558	Homo sapiens	Whole Blood	SLE	age: 33	gender: F	Caucasian	France
GSM1860225	GPL10558	Homo sapiens	Whole Blood	SLE	age: 36	gender: F	Black	Cuba
GSM1860226	GPL10558	Homo sapiens	Whole Blood	SLE	age: 54	gender: F	Caucasian	France
GSM1860227	GPL10558	Homo sapiens	Whole Blood	SLE	age: 22	gender: F	Caucasian	France
GSM1860228	GPL10558	Homo sapiens	Whole Blood	SLE	age: 38	gender: F	Caucasian	France
GSM1860229	GPL10558	Homo sapiens	Whole Blood	SLE	age: 29	gender: F	Caucasian	France
GSM1860230	GPL10558	Homo sapiens	Whole Blood	SLE	age: 35	gender: F	Caucasian	North Africa
GSM1860231	GPL10558	Homo sapiens	Whole Blood	SLE	age: 39	gender: F	Caucasian	North Africa
GSM1860232	GPL10558	Homo sapiens	Whole Blood	SLE	age: 35	gender: F	Caucasian	France
GSM1860233	GPL10558	Homo sapiens	Whole Blood	SLE	age: 25	gender: M	Caucasian	France
GSM1860234	GPL10558	Homo sapiens	Whole Blood	SLE	age: 18	gender: F	Asian	Chi
GSM1860235	GPL10558	Homo sapiens	Whole Blood	SLE	age: 40	gender: F	Caucasian	North Africa
GSM1860236	GPL10558	Homo sapiens	Whole Blood	SLE	age: 54	gender: F	Caucasian	North Africa
GSM1860237	GPL10558	Homo sapiens	Whole Blood	SLE	age: 50	gender: M	Caucasian	France
GSM1860238	GPL10558	Homo sapiens	Whole Blood	SLE	age: 27	gender: M	Asian	Vietnam
GSM1860239	GPL10558	Homo sapiens	Whole Blood	SLE	age: 46	gender: F	Caucasian	France
GSM1860240	GPL10558	Homo sapiens	Whole Blood	SLE	age: 48	gender: F	Caucasian	North Africa
GSM1860241	GPL10558	Homo sapiens	Whole Blood	SLE	age: 29	gender: F	Caucasian	France
GSM1860242	GPL10558	Homo sapiens	Whole Blood	SLE	age: 52	gender: F	Black	Comorres
GSM1860243	GPL10558	Homo sapiens	Whole Blood	SLE	age: 44	gender: F	Caucasian	France
GSM1860244	GPL10558	Homo sapiens	Whole Blood	SLE	age: 56	gender: F	Caucasian	North Africa

## Sheet: Sypplementary Table S2
Supplementary Table S2: 514 iron metabolism (IM) genes
Gene
HFE
IFNG
ISCU
LTF
MIR210
SLC11A2
ACO1
ACO2
BRIP1
CDK5RAP1
CDKAL1
CIAO3
CIAPIN1
DDX11
DNA2
DPYD
ELP3
ERCC2
ETFDH
EXO5
IREB2
ISCA2
LIAS
MOCS1
MUTYH
NDUFS1
NDUFS2
NDUFS7
NDUFS8
NDUFV1
NFU1
NTHL1
NUBP1
NUBP2
NUBPL
POLA1
POLD1
POLE
PPAT
PRIM2
REV3L
RSAD1
RSAD2
RTEL1
SDHB
TYW1
TYW1B
AIFM3
AOX1
CISD1
CISD2
CISD3
FDX1
FDX2
FECH
FXN
GLRX2
GLRX5
ISCA1
NDUFV2
RFESD
UQCRFS1
UQCRFS1P1
XDH
ABCB6
ATP7A
HAMP
MCOLN1
MMGT1
SCARA5
SLC11A1
SLC25A28
SLC25A37
SLC39A14
SLC40A1
STEAP2
STEAP3
STEAP4
TF
TTYH1
ABCB7
ABCG2
ALAS2
ATP13A2
ATP6AP1
ATP6V0A2
ATP6V0D1
ATP6V1A
ATP6V1G1
BMP6
CAND1
CCDC115
CP
CUL1
CYBRD1
ERFE
FBXL5
FLVCR1
FTH1
FTH1P19
FTHL17
FTL
FTMT
GDF2
GLRX3
HEPH
HIF1A
HJV
HMOX1
HMOX2
HPX
LCN2
MYC
NCOA4
NDFIP1
NEDD8
SKP1
SLC22A17
SLC46A1
SMAD4
SOD1
SRI
TFR2
TFRC
TMEM199
TMPRSS6
TTC7A
B2M
BDH2
BTBD9
EIF2AK1
EPAS1
EPB42
HEPHL1
HYAL2
MELTF
NEO1
PICALM
RHAG
STEAP1
ASIC3
FLVCR2
HRG
SLC48A1
MT2A
ACKR1
ACP5
ACSL6
ADD1
ADD2
ADIPOR1
AGPAT4
AHSP
ALAD
ALDH1L1
ALDH6A1
ANK1
AQP3
ARHGEF12
ARL2BP
ASNS
ATG4A
ATP6V0A1
BACH1
BCAM
BLVRA
BLVRB
BMP2K
BNIP3L
BPGM
BSG
BTG2
BTRC
C3
CA1
CA2
CAST
CAT
CCDC28A
CCND3
CDC27
CDR2
CIR1
CLCN3
CLIC2
CPOX
CROCCP2
CTNS
CTSB
CTSE
DAAM1
DCAF10
DCAF11
DCUN1D1
DMTN
E2F2
ELL2
ENDOD1
EPB41
EPOR
ERMAP
EZH1
FBXO34
FBXO7
FBXO9
FN3K
FOXJ2
FOXO3
FTCD
GAPVD1
GATA1
GCLC
GCLM
GDE1
GMPS
GYPA
GYPB
GYPC
GYPE
H1-0
H4C3
HAGH
HBB
HBBP1
HBD
HBQ1
HBZ
HDGF
HEBP1
HMBS
HTATIP2
HTRA2
ICAM4
IGSF3
KAT2B
KDM7A
KEL
KHNYN
KLF1
KLF3
LAMP2
LMO2
LPIN2
LRP10
MAP2K3
MARCHF2
MARCHF8
MARK3
MBOAT2
MFHAS1
MGST3
MINPP1
MKRN1
MOCOS
MOSPD1
MPP1
MXI1
MYL4
NARF
NEK7
NFE2
NFE2L1
NNT
NR3C1
NUDT4
OPTN
OSBP2
P4HA2
PC
PDZK1IP1
PGLS
PIGQ
PPOX
PPP2R5B
PRDX2
PSMD9
RAD23A
RANBP10
RAP1GAP
RBM38
RBM5
RCL1
RHCE
RHD
RIOK3
RNF123
RNF19A
SDCBP
SEC14L1
SELENBP1
SIDT2
SLC10A3
SLC22A4
SLC25A38
SLC2A1
SLC30A1
SLC30A10
SLC4A1
SLC66A2
SLC6A8
SLC6A9
SLC7A11
SMOX
SNCA
SPTA1
SPTB
SYNJ1
TAL1
TCEA1
TENT5C
TFDP2
TMCC2
TMEM9B
TNRC6B
TNS1
TOP1
TRAK2
TRIM10
TRIM58
TSPAN5
TSPO2
TYR
UBAC1
UCP2
UROD
UROS
USP15
VEZF1
XK
XPO7
YPEL5
ATP6V0A4
ATP6V0B
ATP6V0C
ATP6V0D2
ATP6V0E1
ATP6V0E2
ATP6V1B1
ATP6V1B2
ATP6V1C1
ATP6V1C2
ATP6V1D
ATP6V1E1
ATP6V1E2
ATP6V1F
ATP6V1G2
ATP6V1G3
ATP6V1H
RPS27A
TCIRG1
UBA52
UBB
UBC
ALAS1
COX10
COX15
TSPO
AMBP
ATP5IF1
IBA57
SLC25A39
SRRD
TMEM14C
UGT1A1
UGT1A4
ABAT
APBB1
BCL2
BECN1
C1QA
CCNB1
CCND1
CYP1A1
DRD2
G6PD
MAP1LC3A
MDM2
PDX1
SLC6A3
TFAP2A
TFF1
ARHGAP1
CLTC
DNM2
LMTK2
NECTIN1
RAB11B
REP15
SFXN1
ABCE1
ADI1
AGMO
ALKBH1
ALKBH2
ALKBH3
ALKBH8
ALOX12
ALOX12B
ALOX15
ALOX15B
ALOX5
ALOXE3
BBOX1
CALR
CDO1
CH25H
CYGB
CYP11A1
CYP11B1
CYP11B2
CYP17A1
CYP19A1
CYP1A2
CYP1B1
CYP20A1
CYP21A2
CYP24A1
CYP26A1
CYP26B1
CYP26C1
CYP27A1
CYP27B1
CYP27C1
CYP2A13
CYP2A6
CYP2A7
CYP2B6
CYP2C18
CYP2C19
CYP2C8
CYP2C9
CYP2D6
CYP2D7
CYP2E1
CYP2F1
CYP2G1P
CYP2J2
CYP2R1
CYP2S1
CYP2U1
CYP2W1
CYP39A1
CYP3A4
CYP3A43
CYP3A5
CYP3A7
CYP46A1
CYP4A11
CYP4A22
CYP4B1
CYP4F11
CYP4F12
CYP4F2
CYP4F22
CYP4F3
CYP4F8
CYP4V2
CYP4X1
CYP4Z1
CYP4Z2P
CYP51A1
CYP7A1
CYP7B1
CYP8B1
DNAJC24
DOHH
EGLN1
EGLN2
EGLN3
ETHE1
FA2H
FAXDC2
FTO
HAAO
HBA1
HBA2
HIF1AN
JMJD6
KDM3A
MIOX
MSMO1
OGFOD1
OGFOD2
OGFOD3
P3H1
P3H2
P3H3
P4HA1
P4HA3
P4HTM
PAH
PHF2
PHF8
PHYH
PLOD1
PLOD2
PLOD3
PPEF1
PPEF2
PTGIS
RIOX1
RRM2
SC5D
SCD
SCD5
TBXAS1
TET1
TET2
TET3
TH
TMLHE
TPH1
TPH2
TYW5

## Sheet: Supplementary Table S3
Supplementary Table S3: Significant DEGs in the Mixed dataset. Note: Log2FC>1/<-1;P Value<0.05 is set as the standards;Gene.symbol does not have blank
Gene symbol	P Value	Log2FC
FCGR1B	7.38e-19	1.49
IFI27	1.49e-17	5.23
PARP9	7.85e-17	1.43
FBXO6	8.5e-17	1.22
EPSTI1	9.2e-17	2.29
TNFSF13B	4.62e-16	1.19
IFI6	5.3e-16	2.59
FCGR1A	5.75e-16	1.46
IFI44	7.1e-16	2.53
TNFSF10	7.49e-16	1.06
IL1RN	7.72e-16	1.28
SAMD9L	1.51e-15	1.55
RSAD2	1.57e-15	3.19
OASL	2.28e-15	2.32
GBP1	2.87e-15	1.38
IFI44L	2.9e-15	3.65
LAP3	3.29e-15	1.36
EIF2AK2	4.19e-15	1.74
OAS3	4.61e-15	2.44
IFITM1	4.83e-15	1.03
IFIH1	7.55e-15	1.39
ISG15	1.32e-14	2.93
IFIT3	2.97e-14	2.75
OAS1	4.27e-14	2.09
RNASE2	1.19e-13	1.36
IFI35	1.29e-13	1.3
HERC5	1.3e-13	2.38
IFIT1	2.07e-13	2.9
XAF1	2.6e-13	1.78
MT1A	4.17e-13	1.11
LAMP3	6.63e-13	1.2
DDX60	8.63e-13	1.6
IFITM3	1.05e-12	2.09
IFIT2	5.99e-12	1.74
LY6E	8.53e-12	1.9
OAS2	1.26e-11	1.65
MT2A	1.39e-11	1.19
RTP4	2.76e-11	1.53
IFIT5	2.89e-11	1.37
HERC6	3.14e-11	1.51
SERPING1	3.28e-11	1.74
CMPK2	3.36e-11	1.59
KLRB1	5.24e-11	-1.26
DDX58	5.7e-11	1.05
MX1	6.95e-11	1.87
DHX58	7.15e-11	1.3
DDX60L	9.69e-11	1.23
SPATS2L	1.92e-10	1.57
HELZ2	2.17e-10	1.1
IRF7	2.53e-10	1.41
RNA5S9	2.61e-10	-1.46
USP18	2.82e-10	1.44
PARP14	2.82e-10	1.02
CCR1	3.66e-10	1.08
ZBP1	4.74e-10	1.37
SIGLEC1	6.81e-10	1.04
LGALS3BP	7.83e-10	1.22
PARP12	9.37e-10	1.2
OTOF	1.26e-09	2.68
BATF2	1.39e-09	1.18
MX2	1.58e-09	1.04
TRIM22	1.71e-09	1.1
CXCR5	2.85e-09	-1.23
KLRF1	3.15e-09	-1.04
SCO2	5.8e-09	1.02
TNFAIP6	6.39e-09	1.34
GPR183	9.77e-09	-1.04
CXCL10	1.77e-08	1.24
PLSCR1	3.49e-08	1.18
HES4	4.99e-08	1.55
CD79B	5.32e-08	-1.16
RETN	2.14e-07	1.23
RNA28S5	2.75e-07	1.09
FCRLA	3.21e-07	-1.44
HP	9.51e-07	1.2
TCN1	1.4e-06	1.43
CD79A	3.03e-06	-1.02
CLEC12A	3.72e-06	1.1
MPO	4.21e-06	1.24
RNASE3	4.6e-06	1.42
DEFA3	4.64e-06	1.7
DEFA1B	5.86e-06	1.68
DEFA4	6.12e-06	1.91
LCN2	8.3e-06	1.42
CD19	8.36e-06	-1.11
VPREB3	1.01e-05	-1.23
ELANE	1.06e-05	1.7
CEACAM6	1.5e-05	1.55
DEFA1	2.19e-05	1.3
AZU1	2.58e-05	1.11
CCL2	4.27e-05	1.06
OLR1	6.04e-05	1.03
CTSG	6.16e-05	1.38
LTF	0.000103	1.36
MMP8	0.000112	1.17
CEACAM8	0.000169	1.44
OLFM4	0.000181	1.55
CAMP	0.00028	1.24
BPI	0.000313	1.13
ARG159:13:103	0.000583	1.06

## Sheet: Supplementary Table S4
Supplementary Table S4: GO enrichment analysis results of dataset genes in SLE
Category	Terms	Genes	P value
BP	Regulation of innate immune response	PARP9, RSAD2, OASL, OAS3, IFIH1, ISG15, OAS1, IFI35, DDX60, SERPING1, KLRB1, DHX58, IRF7, USP18, PARP14, ZBP1, PLSCR1, LTF, ARG1	2.21036e-09
	Interferon-mediated signaling pathway	IFI27, PARP9, OAS3, IFITM1, ISG15, OAS1, IFITM3, OAS2, IRF7, USP18, PARP14, ZBP1, ARG1	2.55055e-13
	Response to type I interferon	IFI27, OAS3, IFITM1, ISG15, OAS1, IFIT1, IFITM3, OAS2, MX1, IRF7, USP18, ZBP1	7.74064e-13
	Cellular response to type I interferon	IFI27, OAS3, IFITM1, ISG15, OAS1, IFIT1, IFITM3, OAS2, IRF7, USP18, ZBP1	1.02876e-11
GO enrichment analysis results of IM-GENEs in SLE
Category	Terms	Genes	P value
CC	Mitochondrial outer membrane	RSAD2, ACSL6, TSPO, RPS27A, HMOX1, UBA52, UBC, SLC11A2	0.000876
	Mitochondrial inner membrane	RSAD2, CYP1A1, UCP2, SDHB, NDUFV2, TMEM14C, NDUFV1, CYP2E1, ALAS2, SLC25A28	0.010555
MF	Iron-sulfur cluster binding	RSAD2, EXO5, MUTYH, SDHB, NDUFV2, RFESD, NDUFV1, RSAD1, DPYD, MOCS1	9.43e-10
	Metal cluster binding	RSAD2, EXO5, MUTYH, SDHB, NDUFV2, RFESD, NDUFV1, RSAD1, DPYD, MOCS1	9.43e-10
	4 Iron, 4 sulfur cluster binding	RSAD2, EXO5, MUTYH, SDHB, NDUFV1, RSAD1, DPYD, MOCS1	9.85e-09

## Sheet: Supplementary Table S5
Supplementary Table S5:Genes contained in MEbrown module
FCGR1B
IFI27
PARP9
FBXO6
EPSTI1
TNFSF13B
IFI6
FCGR1A
IFI44
TNFSF10
IL1RN
SAMD9L
RSAD2
OASL
GBP1
IFI44L
LAP3
EIF2AK2
OAS3
STAT1
IFITM1
IFIH1
ISG15
IFIT3
OAS1
KLF13
MYD88
IFI35
HERC5
IFIT1
XAF1
TDRD7
MT1A
LAMP3
GRN
DDX60
IFITM3
LGALS9
MEF2D
IFIT2
LY6E
OAS2
MT2A
PRKCSH
NCOA7
RTP4
IFIT5
HERC6
SERPING1
CMPK2
UBE2L6
TOR1B
IFI16
DDX58
MX1
DHX58
JAK2
DDX60L
NEXN
SPATS2L
SAMD9
HELZ2
SNTB1
IRF7
TRAFD1
TAP1
RNA5S9
USP18
PARP14
CCR1
ZBP1
MAD2L1BP
SIGLEC1
TRIM21
LGALS3BP
TYMP
DYNLT1
UNC93B1
PARP12
CHMP5
OTOF
SRRM2
ADAR
BATF2
MX2
TRIM22
DRAP1
CMTR1
ANKFY1
SCO2
CYB561D1
PATL1
LOC100419583
LMO2
GADD45B
CXCL10
FAM46A
MOV10
ACOT9
BST2
PLSCR1
C4orf33
PHF11
RNF213
SOCS1
SRBD1
IRF9
HES4
PSMB8
CEACAM1
NBN
PARP10
REC8
ZNFX1
MARCKS
NUSAP1
MOB3C
LGALS9B
RIN2
LGALS9C
TRIM5
SP110
NOD2
MICB
CSRNP1
BLVRA
CASP1
ODF3B
STAT2
GALM
PIK3AP1
CERK
NT5C3A
TAP2
RGL1
TRIM6
TMEM60
RHBDF2
RNY1
SPG11
HESX1
GBP1P1
CARD16
TXNDC12
SCARB2
ZC3HAV1
GBP2
CCL8
NAGK
ISG20
SHISA5
RAB5B
XRN1
FBXL18
EPHB2
ZCCHC2
WDFY1
RNF31
CARD17
SP100
NTNG2
PARP11
C12orf10
C19orf66
GBP5
CD38
DTX3L
PRKAG2
CCL2
UBQLNL
AZI2
GADD45G
TOR1A
LYRM1
ST13P4
SP140
APOL6
LYSMD2
HLA-H
SAMD4A
CMC2
HLA-B
MT1G
TIMM10
NUB1
GORASP1
JUP
C1GALT1
HSH2D
SYNE3
ETV7
SLC3A2
C18orf25
ELF1
NMI
ARRB1
GRAMD1B
UBA7
RAB8A
ZNF684
TMEM123
SLC27A3
TTC21A
PDXK
TMEM268
CYSLTR1
KIAA1958
APOL2
EPHB1
PDE9A
PDK3
BTF3
AXL
DHRS9
TRIM38
GIMAP4
MAP1LC3B2
TMEM62
BTN3A1
TRIM56
ZFYVE26
